# Supplementary material for: How does initial soil moisture influence the hydrological response? Acase study from southern France
Source: Copernicus journal article supplement (doi:10.5194/hess-2018-28), 2018-02-05
Supplement: Supplementary file 1 [file S2_Pictures_Overland_Flow_Claduegne_23_10_2013.pdf › Supplementary_Material/S2_Pictures_Overland_Flow_Claduegne_23_10_2013.pdf]

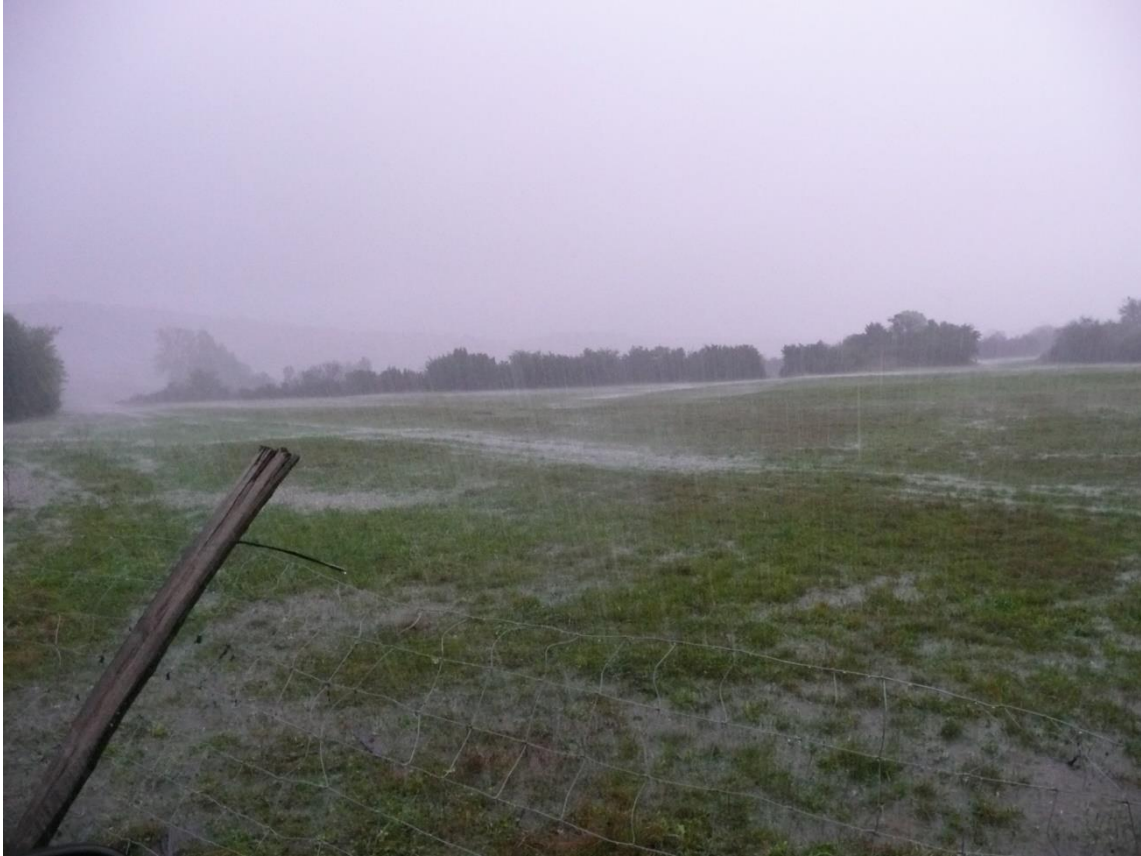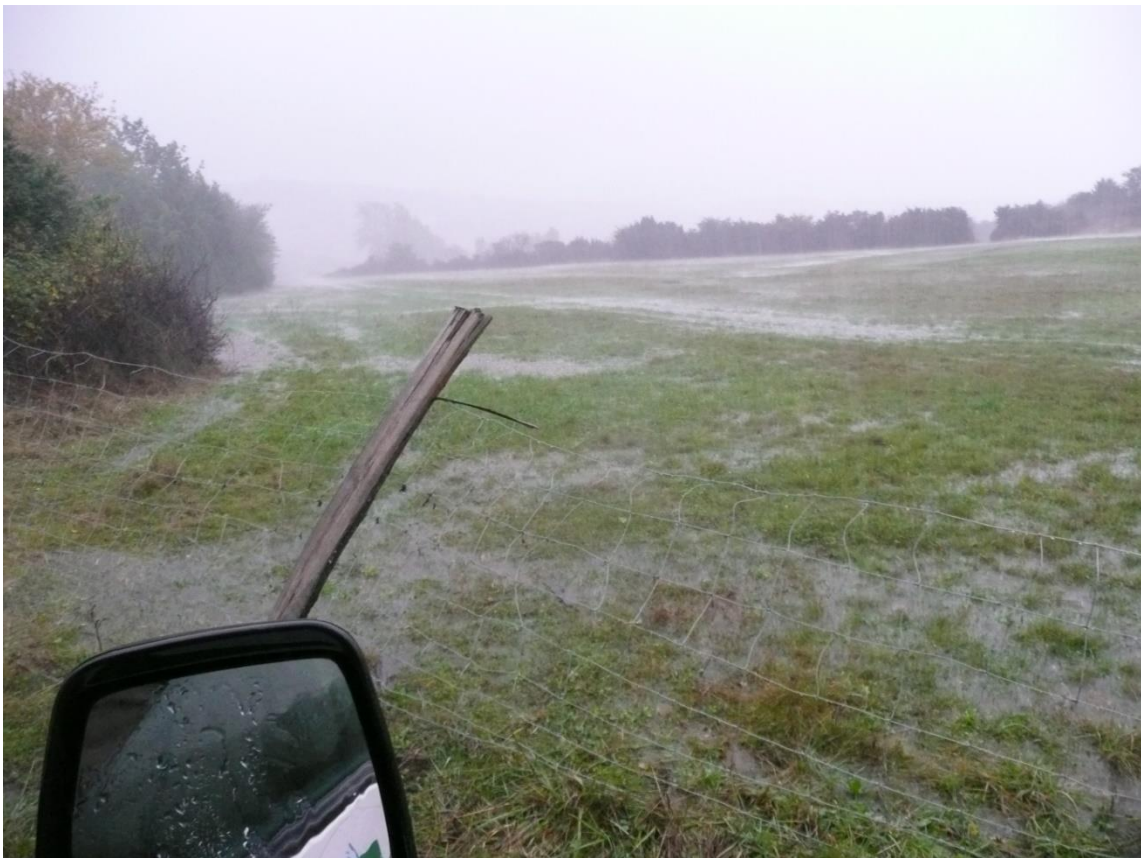

Overland flow observed in the north of the Claduègne catchment ( $44^{\circ}39'55.97''\text{N}$   $4^{\circ}33'2.08''\text{E}$ ). The pictures were taken on October 23rd, 2013 07:45 UTC. Credit: G. Nord.
